# Supplementary material for: Achieving advanced hydrogen evolution under large current density using an amorphous/crystalline core–shell electrocatalyst of a-NiCoP/Co 2 P
Source: Royal Society of Chemistry journal article supplement (doi:10.1039/d4dt03258f), 2025-01-01
Supplement: d4dt03258f1.pdf [file d4dt03258f1.pdf]

## Supporting Information

### **Achieving advanced hydrogen evolution under large current density by amorphous/crystalline core/shell electrocatalyst of a-NiCoP/Co<sub>2</sub>P**

Xiaodong Chen<sup>a</sup>, Zhi Cheng<sup>a</sup>, Jiao Li<sup>a</sup>, Hongyu Chen<sup>b</sup>, Siyuan Liu<sup>a</sup>, Shuxian Wei<sup>b</sup>, Zhaojie Wang<sup>a,\*</sup>, Xiaoqing Lu<sup>a,\*</sup>

<sup>a</sup> *School of Materials Science and Engineering, China University of Petroleum, Qingdao, 266580, PR China*

<sup>b</sup> *College of Science, China University of Petroleum, Qingdao, 266580, PR China*

\* Corresponding authors: Zhaojie Wang, and Xiaoqing Lu

E-mail address: wangzhaojie@upc.edu.cn, and luxq@upc.edu.cn

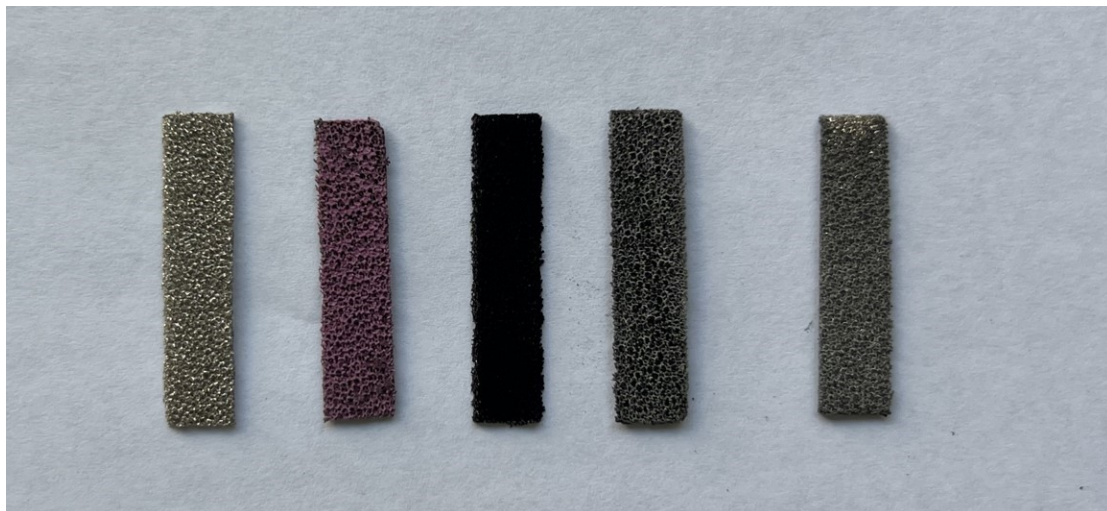

Figure S1. The optical pictures of Ni foam substrate, Co-CH@NF precursor, Co<sub>2</sub>P@NF, a-NiCoP/Co<sub>2</sub>P@NF, and a-NiCoP@NF (from left to right).

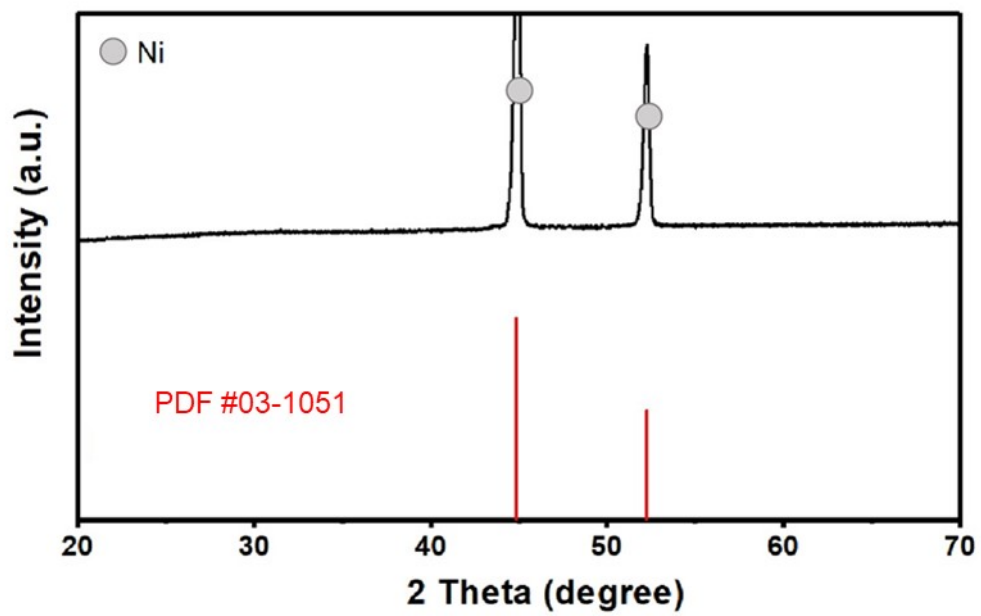

Figure S2. XRD pattern of Ni Foam substrate.

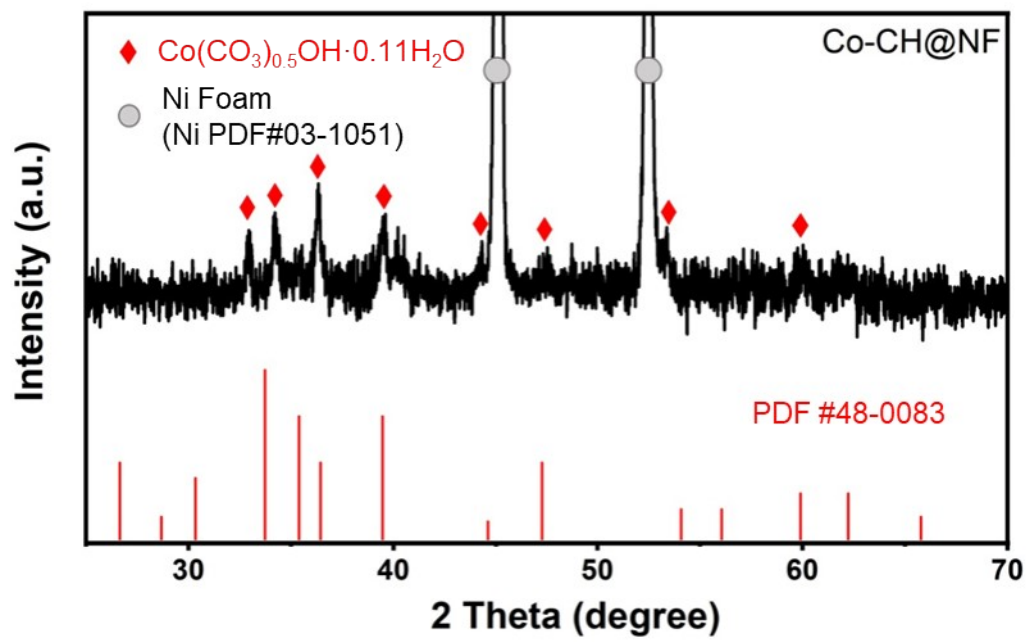

Figure S3. XRD pattern for Co-CH@NF precursor.

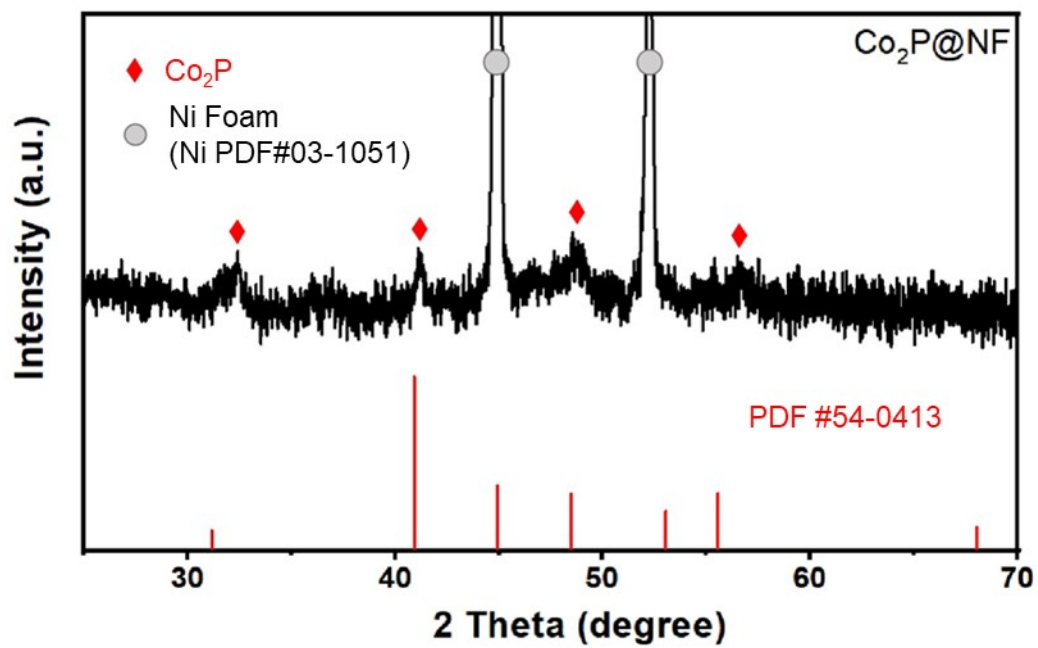

Figure S4. XRD pattern for Co<sub>2</sub>P@NF.

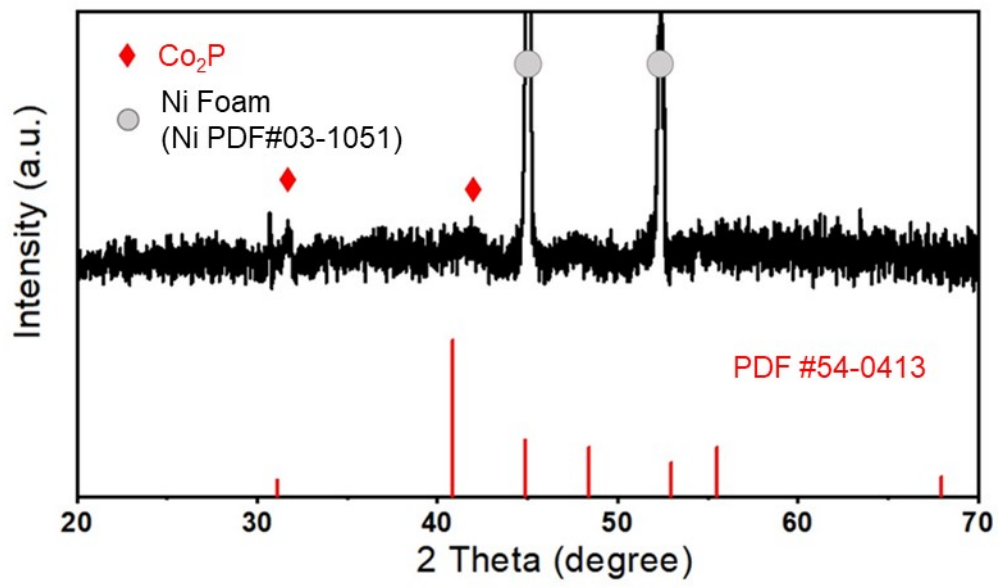

Figure S5. XRD pattern for a-NiCoP/Co<sub>2</sub>P@NF.

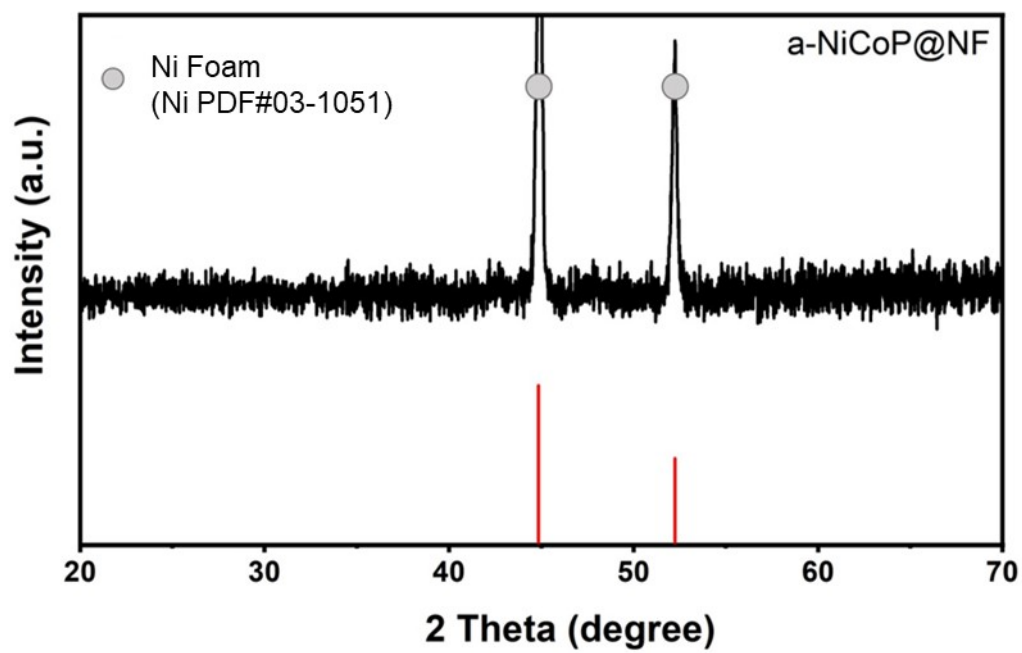

Figure S6. XRD pattern for a-NiCoP@NF.

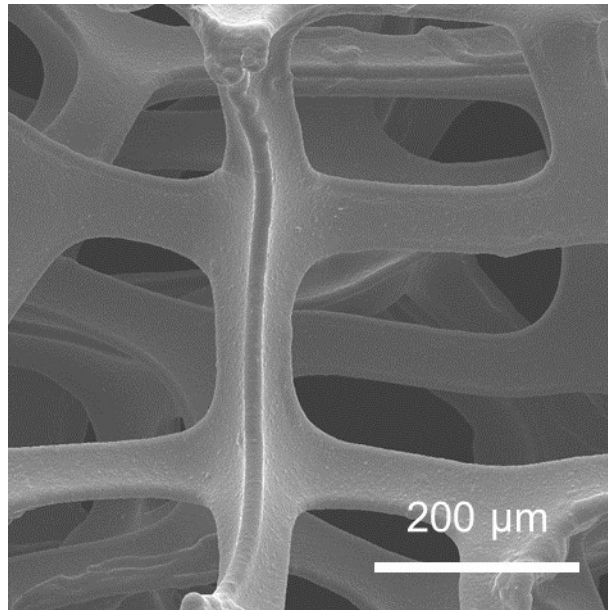

Figure S7. SEM image of Ni Foam substrate.



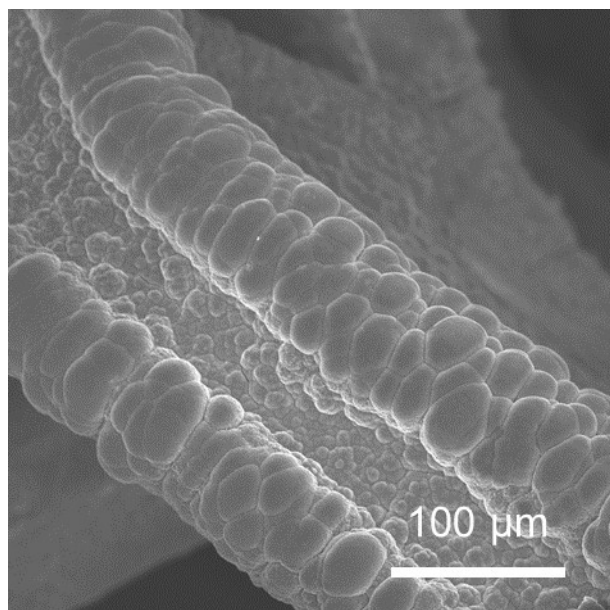

Figure S8. SEM image of a-NiCoP@NF.

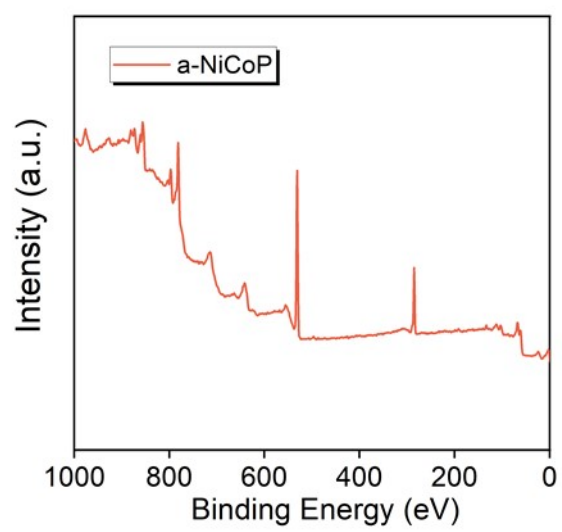

Figure S9. XPS survey of a-NiCoP@NF.

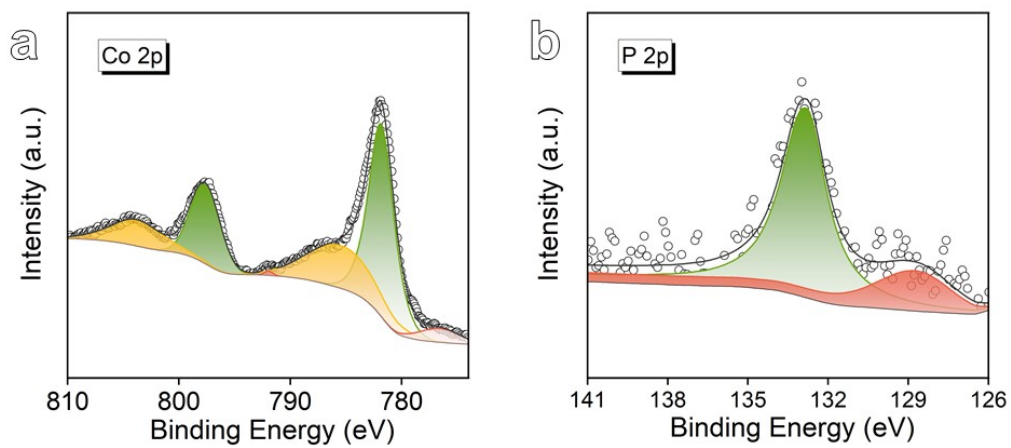

Figure S10. (a) Co 2p and (b) P 2p XPS spectra of a-NiCoP.

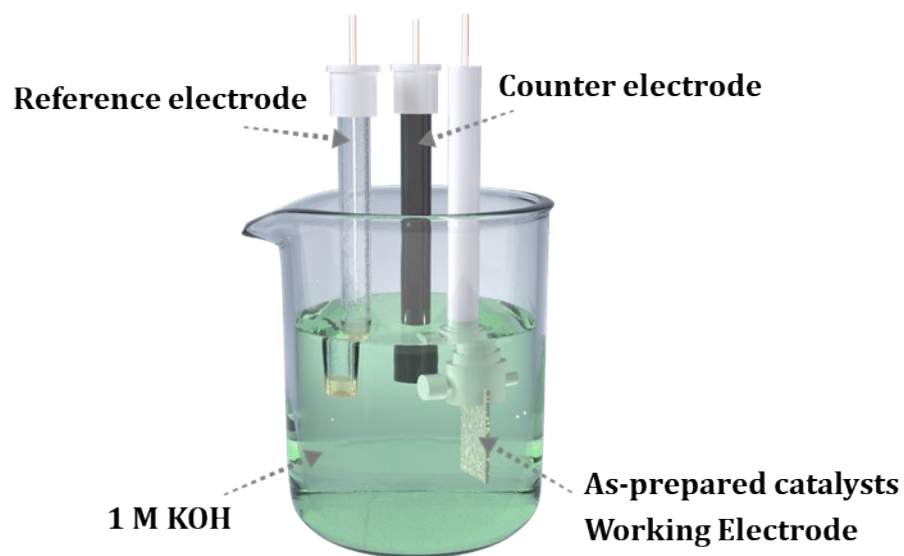

Figure S11. Schematic illustration of the three-electrode electrochemical testing system.

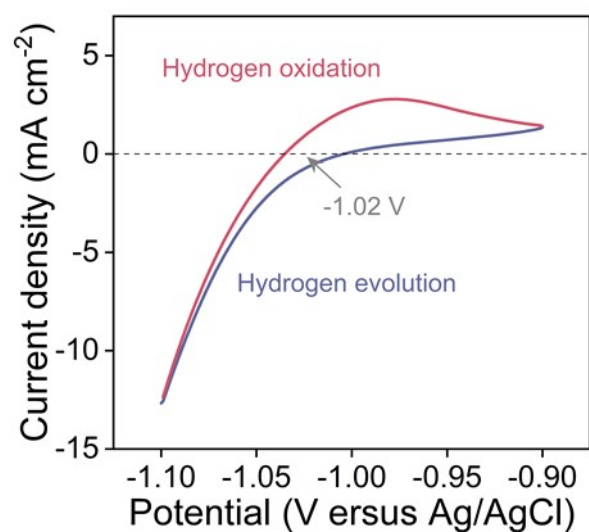

Figure S12. The reference electrode Ag/AgCl calibration in 1 M KOH.

#### Reference Electrode Calibration:

The correction was performed at three-electrode system with platinum sheets as counter electrode and working electrode under electrolyte hydrogen saturation. In 1 M KOH alkaline medium, corrected the Ag/AgCl reference electrode. The Cyclic Voltammetry (CV) cycles stable was operated at a scanning rate of 5 mV s<sup>-1</sup>. Then, the average of the two potentials at which the current crossed zero in a single CV cycle were taken to be the thermodynamic potential for the hydrogen electrode reaction. Therefore, in 1 M KOH alkaline media,  $E_{\text{RHE}} = E_{\text{Ag/AgCl}} + 1.02 \text{ V}$ .

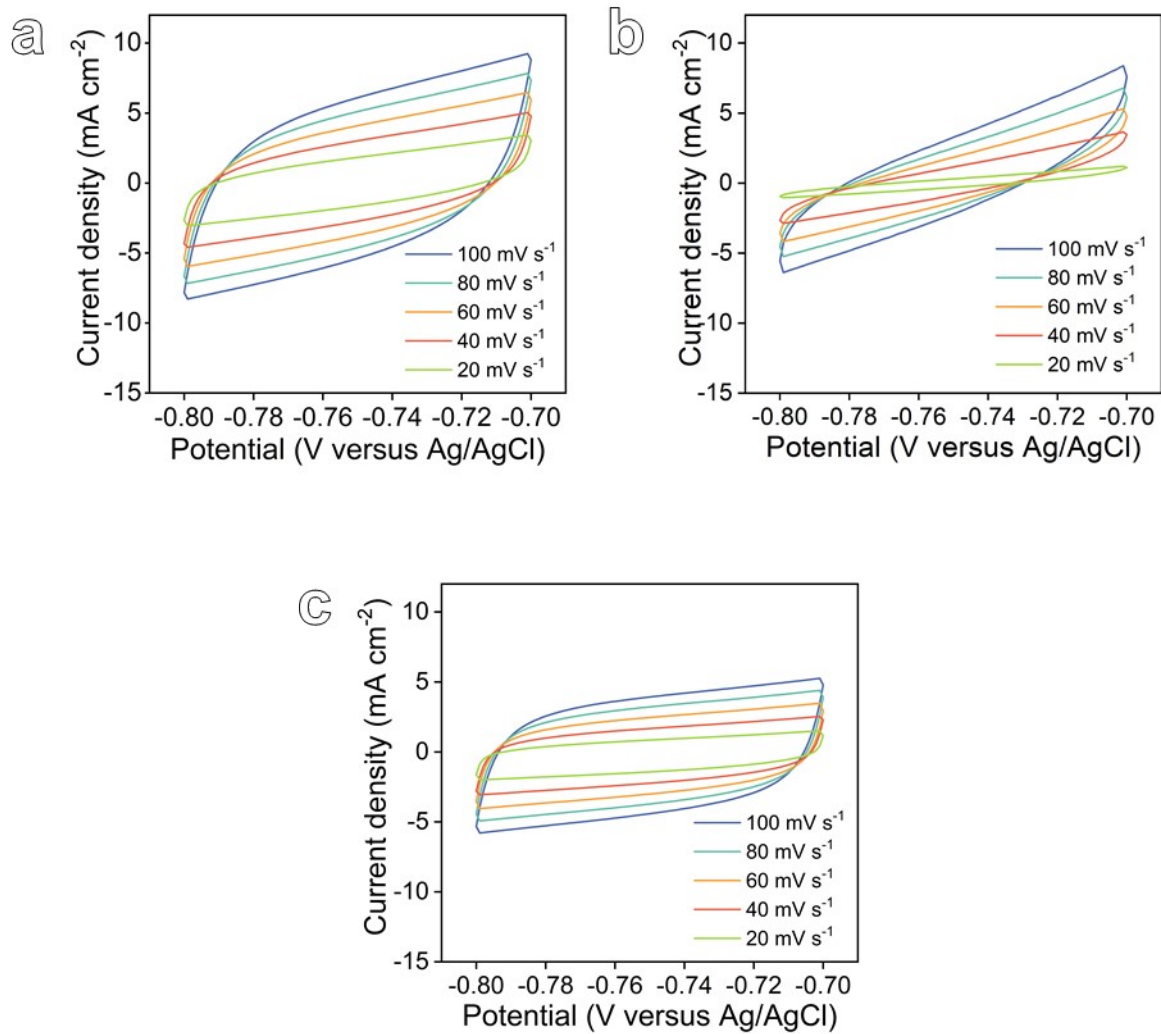

Figure S13. Cyclic voltammogram curves of (a) a-NiCoP/Co<sub>2</sub>P@NF, (b) a-NiCoP@NF and (c) Co<sub>2</sub>P@NF.

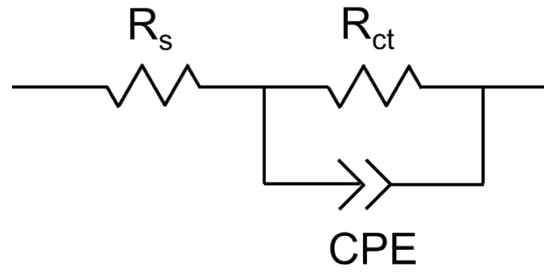

Figure S14. Schematic diagram of the electrode structure and the equivalent circuit

mod.

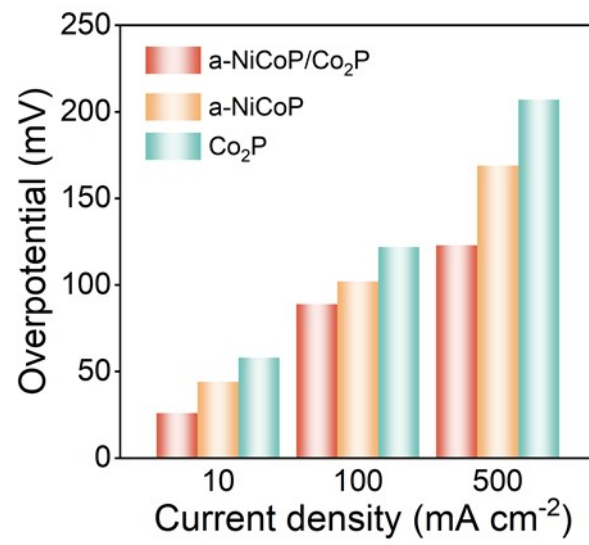

Figure S15. Comparison with  $\eta_{10}$ ,  $\eta_{100}$ ,  $\eta_{500}$  of a-NiCoP/Co<sub>2</sub>P@NF, a-NiCoP@NF, Co<sub>2</sub>P@NF measured in 1 M KOH.



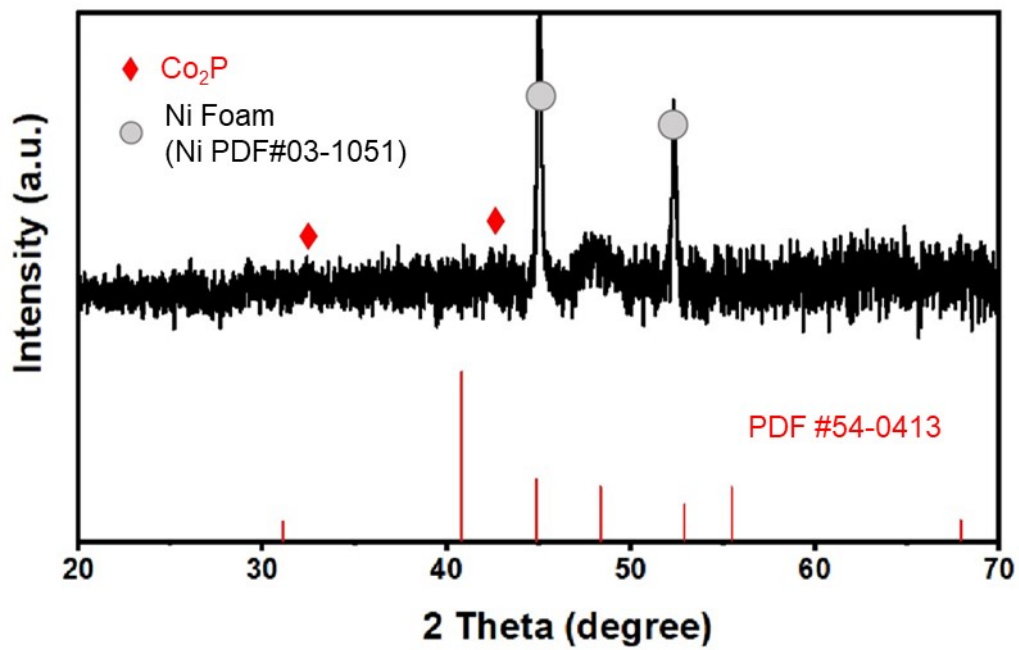

Figure S16. XRD pattern of a-NiCoP/Co<sub>2</sub>P@NF after stability testing.

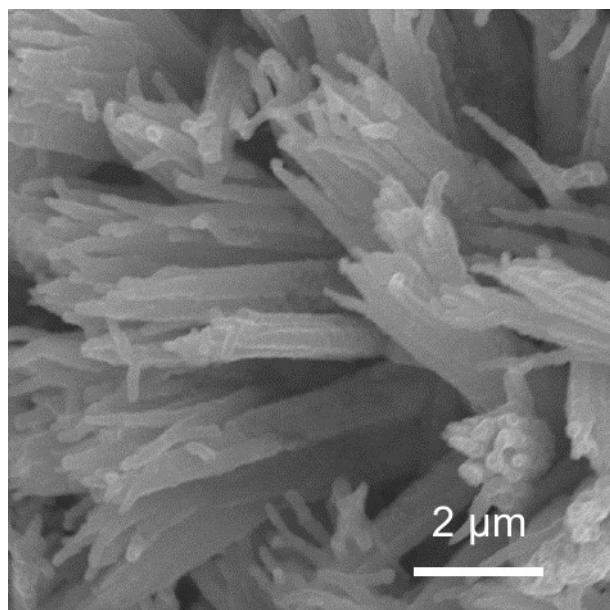

Figure S17. SEM image of a-NiCoP/Co<sub>2</sub>P@NF after stability testing.

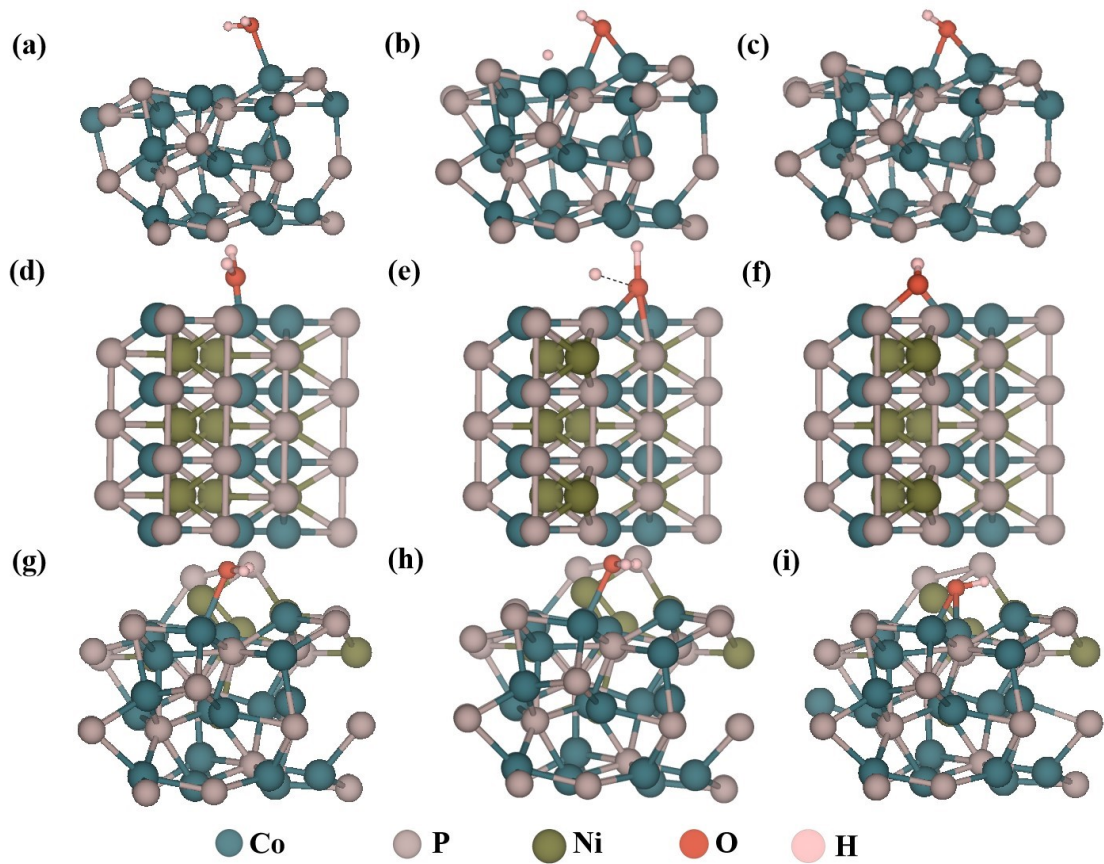

Figure S18. The optimized structure model and adsorption of different reaction intermediates: (a-c)  $\text{Co}_2\text{P}$ , (d-f) a-NiCoP, and (g-i) a-NiCoP/ $\text{Co}_2\text{P}$ .

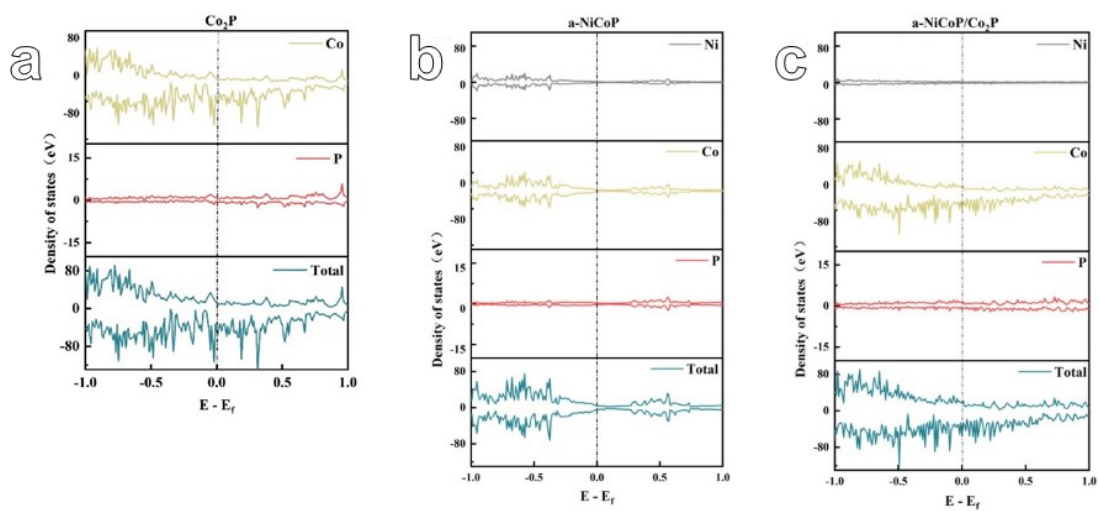

Figure S19. Density of states of (a) Co<sub>2</sub>P, (b) a-NiCoP, and (c) a-NiCoP/Co<sub>2</sub>P, respectively.

Table S1. Comparison with the recently reported performance of some non-precious metal HER electrocatalysts measured in 1 M KOH.

| Electrocatalysts                                                            | Electrode             | $\eta_{10}$<br>(mV) | $\eta_{100}$<br>(mV) | $\eta_{500}$<br>(mV) | Reference |
|-----------------------------------------------------------------------------|-----------------------|---------------------|----------------------|----------------------|-----------|
| a-NiCoP/Co <sub>2</sub> P                                                   | Ni Foam               | 26                  | 89                   | 123                  | this work |
| CoP/Ni(OH) <sub>2</sub>                                                     | Cu Foam               | 48                  | 108                  | 175                  | [1]       |
| A-NiCo LDH/NF                                                               | Ni Foam               | 36                  | 151                  | 286                  | [2]       |
| Cr-CoP-NR/CC                                                                | Carbon cloth          | 38                  | 101                  | 209                  | [3]       |
| MoC-Mo <sub>2</sub> C-790                                                   | Mo Sheet              | 98.2                | NA                   | 292                  | [4]       |
| NiFeMo IOS                                                                  | Ni Foam               | 33                  | NA                   | 249                  | [5]       |
| CoP/Ni <sub>2</sub> P                                                       | Ni Foam               | 16                  | 85                   | 209                  | [6]       |
| (Ni <sub>x</sub> Fe <sub>y</sub> Co <sub>6-x-y</sub> )<br>Mo <sub>6</sub> C | Ni Foam               | 20                  | NA                   | 194                  | [7]       |
| OH-Ni/Ni <sub>3</sub> C                                                     | Glassy Carbon         | 72                  | NA                   | 276                  | [8]       |
| NiFe-<br>LDH/MXene/NF                                                       | Ni Foam               | 132                 | NA                   | 205                  | [9]       |
| CoMoS <sub>x</sub> /NF                                                      | Ni Foam               | 89                  | NA                   | 269                  | [10]      |
| NiCo/NiCo-OH                                                                | Ni Foam               | 19                  | 104                  | 184                  | [11]      |
| SANi-I                                                                      | Ni Foam               | NA                  | 60                   | 160                  | [12]      |
| A-CFC                                                                       | Carbon Fiber<br>Cloth | 78                  | 160                  | 260                  | [13]      |
| Ni/NiFeMoO <sub>x</sub> /NF                                                 | Ni Foam               | 22                  | 117                  | NA                   | [14]      |
| MFN-MOFs/NF                                                                 | Ni Foam               | 79                  | NA                   | 234                  | [15]      |

|                                         |              |     |     |     |      |
|-----------------------------------------|--------------|-----|-----|-----|------|
| NiMnOP/NF                               | Ni Foam      | 91  | NA  | 195 | [16] |
| 2H-MoS <sub>2</sub>                     | Carbon Cloth | 115 | 231 | 332 | [17] |
| CoO <sub>x</sub> -CoSe                  | Ni Foam      | 90  | 300 | 380 | [18] |
| Cu-FeOOH/Fe <sub>3</sub> O <sub>4</sub> | Iron foam    | NA  | 129 | 285 | [19] |
| NiCoS <sub>x</sub> @CoCH<br>NAs/NF      | Ni Foam      | 55  | 199 | 338 | [20] |

---

Table S2. ECSA of a-NiCoP/CoP@NF、a-NiCoP/CoP@NF、CoP@NF.

| Sample                       | $C_{dl}$ (mF) | $C_s$ (mF cm <sup>-2</sup> ) | ECSA (cm <sup>-2</sup> ) |
|------------------------------|---------------|------------------------------|--------------------------|
| a-NiCoP@NF                   | 4             | 0.04                         | 100                      |
| Co <sub>2</sub> P@NF         | 38            | 0.04                         | 950                      |
| a-NiCoP/Co <sub>2</sub> P@NF | 50            | 0.04                         | 1250                     |

Table S3. The adsorption energy of different positions in a-NiCoP/CoP.

| Site | Adsorption Energy                   |
|------|-------------------------------------|
| I    | $E_{\text{ads}} = -0.10 \text{ eV}$ |
| II   | $E_{\text{ads}} = -0.39 \text{ eV}$ |
| III  | $E_{\text{ads}} = 0.02 \text{ eV}$  |



## References

- [1] F.-L. Wang, Y.-N. Zhou, J.-Y. Lv, B. Dong, X.-Y. Zhang, W.-L. Yu, J.-Q. Chi, Z.-X. Wu, L. Wang, Y.-M. Chai, Nickel hydroxide armour promoted CoP nanowires for alkaline hydrogen evolution at large current density, *International Journal of Hydrogen Energy*, 47 (2022) 1016-1025.
- [2] H. Yang, Z. Chen, P. Guo, B. Fei, R. Wu, B-doping-induced amorphization of LDH for large-current-density hydrogen evolution reaction, *Applied Catalysis B: Environmental*, 261 (2020).
- [3] L. Zhang, J. Zhang, J. Fang, X.Y. Wang, L. Yin, W. Zhu, Z. Zhuang, Cr-Doped CoP Nanorod Arrays as High-Performance Hydrogen Evolution Reaction Catalysts at High Current Density, *Small*, 17 (2021) e2100832.
- [4] W. Liu, X. Wang, F. Wang, K. Du, Z. Zhang, Y. Guo, H. Yin, D. Wang, A durable and pH-universal self-standing MoC-Mo<sub>2</sub>C heterojunction electrode for efficient hydrogen evolution reaction, *Nat Commun*, 12 (2021) 6776.
- [5] C.-T. Hsieh, C.-L. Huang, Y.-A. Chen, S.-Y. Lu, NiFeMo alloy inverse-opals on Ni foam as outstanding bifunctional catalysts for electrolytic water splitting of ultra-low cell voltages at high current densities, *Applied Catalysis B: Environmental*, 267 (2020).
- [6] M. Jin, X. Zhang, R. Shi, Q. Lian, S. Niu, O. Peng, Q. Wang, C. Cheng, Hierarchical CoP@Ni<sub>2</sub>P catalysts for pH-universal hydrogen evolution at high current density, *Applied Catalysis B: Environmental*, 296 (2021).
- [7] L.-G. He, P.-Y. Cheng, C.-C. Cheng, C.-L. Huang, C.-T. Hsieh, S.-Y. Lu, (Ni<sub>x</sub>Fe<sub>y</sub>Co<sub>6-x-y</sub>)Mo<sub>6</sub>C cuboids as outstanding bifunctional electrocatalysts for overall water splitting, *Applied Catalysis B: Environmental*, 290 (2021).
- [8] Q. Wen, J. Duan, W. Wang, D. Huang, Y. Liu, Y. Shi, J. Fang, A. Nie, H. Li, T. Zhai, Engineering a Local Free Water Enriched Microenvironment for Surpassing Platinum Hydrogen Evolution Activity, *Angew Chem Int Ed Engl*, 61 (2022) e202206077.
- [9] M. Yu, Z. Wang, J. Liu, F. Sun, P. Yang, J. Qiu, A hierarchically porous and hydrophilic 3D nickel-iron/MXene electrode for accelerating oxygen and hydrogen evolution at high current densities, *Nano Energy*, 63 (2019).
- [10] X. Shan, J. Liu, H. Mu, Y. Xiao, B. Mei, W. Liu, G. Lin, Z. Jiang, L. Wen, L. Jiang, An Engineered Superhydrophilic/Superaerophobic Electrocatalyst Composed of the Supported CoMoS<sub>x</sub> Chalcogenide for Overall Water Splitting, *Angew Chem Int Ed Engl*, 59 (2020) 1659-1665.
- [11] W. Zhu, W. Chen, H. Yu, Y. Zeng, F. Ming, H. Liang, Z. Wang, NiCo/NiCo-OH and NiFe/NiFe-OH core shell nanostructures for water splitting electrocatalysis at large currents, *Applied Catalysis B: Environmental*, 278 (2020).
- [12] Y. Zhao, T. Ling, S. Chen, B. Jin, A. Vasileff, Y. Jiao, L. Song, J. Luo, S.Z. Qiao, Non-metal Single-Iodine-Atom Electrocatalysts for the Hydrogen Evolution Reaction, *Angew Chem Int Ed Engl*, 58 (2019) 12252-12257.
- [13] Y. Xue, L. Hui, H. Yu, Y. Liu, Y. Fang, B. Huang, Y. Zhao, Z. Li, Y. Li, Rationally engineered active sites for efficient and durable hydrogen generation, *Nat Commun*, 10 (2019) 2281.
- [14] Y.K. Li, G. Zhang, W.T. Lu, F.F. Cao, Amorphous Ni-Fe-Mo Suboxides Coupled with Ni Network as Porous Nanoplate Array on Nickel Foam: A Highly Efficient and Durable Bifunctional Electrode for Overall Water Splitting, *Adv Sci (Weinh)*, 7 (2020) 1902034.
- [15] D. Senthil Raja, H.-W. Lin, S.-Y. Lu, Synergistically well-mixed MOFs grown on nickel foam as highly efficient durable bifunctional electrocatalysts for overall water splitting at high current densities,

Nano Energy, 57 (2019) 1-13.

[16] J. Balamurugan, T.T. Nguyen, V. Aravindan, N.H. Kim, J.H. Lee, Highly reversible water splitting cell building from hierarchical 3D nickel manganese oxyphosphide nanosheets, Nano Energy, 69 (2020).

[17] Y. Shi, D. Zhang, H. Miao, X. Wu, Z. Wang, T. Zhan, J. Lai, L. Wang, Amorphous/2H-MoS<sub>2</sub> nanoflowers with P doping and S vacancies to achieve efficient pH-universal hydrogen evolution at high current density, Science China Chemistry, 65 (2022) 1829-1837.

[18] X. Xu, P. Du, Z. Chen, M. Huang, An electrodeposited cobalt–selenide-based film as an efficient bifunctional electrocatalyst for full water splitting, Journal of Materials Chemistry A, 4 (2016) 10933-10939.

[19] C. Yang, W. Zhong, K. Shen, Q. Zhang, R. Zhao, H. Xiang, J. Wu, X. Li, N. Yang, Electrochemically Reconstructed Cu-FeOOH/Fe<sub>3</sub>O<sub>4</sub>

Catalyst for Efficient Hydrogen Evolution in Alkaline Media, Advanced Energy Materials, 12 (2022).

[20] X. Zhang, R. Zheng, M. Jin, R. Shi, Z. Ai, A. Amini, Q. Lian, C. Cheng, S. Song, NiCoS<sub>x</sub>@Cobalt Carbonate Hydroxide Obtained by Surface Sulfurization for Efficient and Stable Hydrogen Evolution at Large Current Densities, ACS Appl Mater Interfaces, 13 (2021) 35647-35656.
